# Supplementary material
Source: publisher figshare collection journal article supplement (https://springernature.figshare.com/ndownloader/files/21929163)
Supplement: Supplementary file [file 21929163]

**Analyses of energy metabolism and stress defence provide insights into *Campylobacter concisus* growth and pathogenicity**

**Table S9: Query genes and proteins from *C jejuni* subsp. *jejuni* NCTC 11168 that were used to identify genes and proteins for oxidative and nitrosative stress defence in *C. concisus***

| <i>Gene name</i> | <i>Locus tag</i> | Function                                                                                                                                                       | Reference  |
|------------------|------------------|----------------------------------------------------------------------------------------------------------------------------------------------------------------|------------|
| <i>docA</i>      | <i>cj0020c</i>   | cytochrome C peroxidase with unknown specificity                                                                                                               | 10         |
|                  | <i>cj0358</i>    | cytochrome C peroxidase with unknown specificity                                                                                                               | 10         |
| <i>ahpC</i>      | <i>cj0334</i>    | alkyl hydroperoxide reductase is involved in oxidative stress defence possibly from an endogenous organic peroxide                                             | 11         |
| <i>bcp</i>       | <i>cj0271</i>    | bacterioferritin comigratory protein acts as a peroxide reductase able to act on a wide variety of compounds including hydrogen peroxide and organic peroxides | 12         |
| <i>dps</i>       | <i>cj1534c</i>   | DNA-binding protein involved in sequestration of Fe ions                                                                                                       | 13, 14, 15 |
| <i>katA</i>      | <i>cj1385</i>    | catalase converts hydrogen peroxide into water and oxygen                                                                                                      | 13         |
| <i>mdaB</i>      | <i>cj1545c</i>   | reduction of soluble quinones in <i>Helicobacter pylori</i>                                                                                                    | 13, 16     |
| <i>msrA</i>      | <i>cj0637c</i>   | S-isomer specific methionine sulfoxide reductase reduces oxidized S-methionine                                                                                 | 17         |
| <i>msrB</i>      | <i>cj1112c</i>   | R-isomer specific methionine sulfoxide reductase reduces oxidized R-methionine                                                                                 | 17         |
| <i>rrc</i>       | <i>cj0012c</i>   | desulforubryrthrin is involved in hydrogen peroxide detoxification                                                                                             | 13         |
| <i>sodB</i>      | <i>cj0169</i>    | superoxide dismutase converts superoxide to hydrogen peroxide and oxygen                                                                                       | 13         |
| <i>tpx</i>       | <i>cj0779</i>    | thiol peroxidase reduces hydrogen peroxide                                                                                                                     | 12         |
| <i>cgb</i>       | <i>cj1586</i>    | single domain hemoglobin involved in nitric oxide detoxification                                                                                               | 18         |
| <i>ctb</i>       | <i>cj0465c</i>   | truncated hemoglobin involved in nitric oxide detoxification                                                                                                   | 19         |
| <i>nrfA</i>      | <i>cj1357c</i>   | nitrite reductase reduces nitrite to ammonia, and is involved in nitric oxide detoxification                                                                   | 20         |
